# Supplementary material
Source: Springer Nature journal article supplement (https://www.springermedizin.de/resource/supplementary/13034_2014_269_MOESM3_ESM.pdf/9652678)

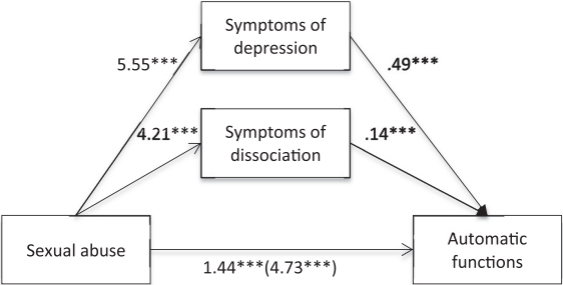

Supplement: MOESM3 [file 9652678]
